# Supplementary material for: Molecular structures of free quinuclidine and its adducts with metal trihydrides, MH3 (M = B, Al or Ga), studied by gas-phase electron diffraction, X-ray diffraction and quantum chemical calculations
Source: Royal Society of Chemistry journal article supplement (doi:10.1039/b701476g), 2007-01-01

## Molecular structures of free quinuclidine and its adducts with metal trihydrides, $MH_3$ ( $M = B, Al$ or $Ga$ ), studied by gas-phase electron diffraction, X-ray diffraction and quantum chemical calculations

Derek A. Wann,<sup>a</sup> Frank Blockhuys,<sup>b</sup> Christian Van Alsenoy,<sup>b</sup> Heather E. Robertson,<sup>a</sup> Hans-Jörg Himmel,<sup>c</sup> Christina Y. Tang,<sup>d</sup> Andrew R. Cowley,<sup>d</sup> Anthony J. Downs<sup>d</sup> and David W. H. Rankin\*<sup>a</sup>

### Supplementary Information

**Table S1** Experimental parameters for the GED analyses of **1–3**.<sup>a</sup>

|                                      | <b>1</b>  |          | <b>2</b>            |          | <b>3</b> |          |
|--------------------------------------|-----------|----------|---------------------|----------|----------|----------|
| Nozzle-to-film distance <sup>b</sup> | 93.45     | 254.87   | 203.39 <sup>c</sup> | 264.45   | 93.71    | 261.44   |
| $T_{\text{sample}}$                  | 382       | 365      | 353                 | 343      | 371      | 368      |
| $T_{\text{nozzle}}$                  | 398       | 393      | 363                 | 358      | 383      | 378      |
| $\Delta s$                           | 0.4       | 0.2      | 0.2                 | 0.1      | 0.2      | 0.1      |
| $s_{\text{min}}$                     | 10.0      | 2.0      | 4.0                 | 2.0      | 8.0      | 2.0      |
| $s_{W1}$                             | 12.0      | 4.0      | 6.0                 | 4.0      | 10.0     | 4.0      |
| $s_{W2}$                             | 30.4      | 13.0     | 18.0                | 6.8      | 31.0     | 12.9     |
| $s_{\text{max}}$                     | 35.6      | 15.2     | 21.0                | 8.0      | 36.0     | 14.0     |
| Correlation parameter                | 0.4376    | 0.4321   | 0.4653              | 0.4970   | -0.2051  | 0.4723   |
| Scale factor, $k$                    | 0.687(10) | 0.739(4) | 0.462(7)            | 0.455(8) | 0.588(5) | 0.591(2) |
| Electron wavelength, $\lambda$       | 6.02      | 6.02     | 6.13                | 6.13     | 6.13     | 6.13     |

<sup>a</sup> Nozzle-to-film distances are in mm, temperatures are in K,  $s$  values are in  $\text{nm}^{-1}$  and electron wavelengths are in pm. Values in parentheses are standard deviations of the last digits. <sup>b</sup> Determined by reference to scattering patterns of benzene. <sup>c</sup> For **2** data were collected using a medium nozzle-to-film distance rather than the short distance used for **1** and **3**. This was necessary because thermal decomposition occurred at the higher temperature required to obtain data at the shorter distance.

**Table S2** Interatomic distances ( $r_a$  in Å), experimental and calculated amplitudes of vibration ( $u_{h1}$  in Å) and curvilinear corrections ( $k_{h1}$  in Å) from the SARACEN refinement of **1**. See Figure 2 for atom numbering.

|          | Atom pair   | $r_a$     | $u_{h1}$ (exp.)          | $k_{h1}$ | $u_{h1}$ (calc.) |
|----------|-------------|-----------|--------------------------|----------|------------------|
| $u_1$    | C(2)–H'(2)  | 1.109(2)  | 0.086(2)                 | 0.004    | 0.077            |
| $u_2$    | C(2)–H(2)   | 1.109(2)  | 0.086(tied to $u_1$ )    | 0.004    | 0.077            |
| $u_3$    | C(4)–H(4)   | 1.109(2)  | 0.086(tied to $u_1$ )    | 0.004    | 0.077            |
| $u_4$    | C(3)–H(3)   | 1.109(2)  | 0.086(tied to $u_1$ )    | 0.004    | 0.077            |
| $u_5$    | C(3)–H'(3)  | 1.109(2)  | 0.086(tied to $u_1$ )    | 0.004    | 0.077            |
| $u_6$    | N(1)–C(2)   | 1.463(2)  | 0.040(2)                 | 0.001    | 0.050            |
| $u_7$    | C(3)–C(4)   | 1.547(3)  | 0.041(tied to $u_6$ )    | 0.002    | 0.052            |
| $u_8$    | C(2)–C(3)   | 1.562(4)  | 0.042(tied to $u_6$ )    | 0.001    | 0.053            |
| $u_9$    | H(2)⋯H'(2)  | 1.771(14) | 0.123(fixed)             | 0.001    | 0.123            |
| $u_{10}$ | H(3)⋯H'(3)  | 1.777(14) | 0.123(fixed)             | 0.001    | 0.123            |
| $u_{11}$ | N(1)⋯H(2)   | 2.075(12) | 0.104(3)                 | –0.001   | 0.103            |
| $u_{12}$ | N(1)⋯H'(2)  | 2.084(12) | 0.105(tied to $u_{11}$ ) | –0.001   | 0.104            |
| $u_{13}$ | H(3)⋯C(4)   | 2.169(12) | 0.108(tied to $u_{11}$ ) | –0.001   | 0.108            |
| $u_{14}$ | C(3)⋯H(4)   | 2.188(3)  | 0.106(tied to $u_{11}$ ) | 0.001    | 0.106            |
| $u_{15}$ | H(3)⋯C(4)   | 2.181(11) | 0.109(tied to $u_{11}$ ) | –0.001   | 0.109            |
| $u_{16}$ | C(2)⋯H(3)   | 2.257(10) | 0.108(tied to $u_{11}$ ) | –0.001   | 0.108            |
| $u_{17}$ | C(2)⋯H'(3)  | 2.198(13) | 0.108(tied to $u_{11}$ ) | –0.001   | 0.108            |
| $u_{18}$ | H(2)⋯C(3)   | 2.189(14) | 0.107(tied to $u_{11}$ ) | 0.000    | 0.107            |
| $u_{19}$ | H'(2)⋯C(3)  | 2.247(11) | 0.106(tied to $u_{11}$ ) | 0.000    | 0.106            |
| $u_{20}$ | H(2)⋯H(3)   | 2.399(21) | 0.173(fixed)             | 0.013    | 0.173            |
| $u_{21}$ | H'(4)⋯H'(3) | 2.399(21) | 0.174(fixed)             | 0.013    | 0.174            |
| $u_{22}$ | C(2)⋯C(6)   | 2.378(2)  | 0.068(tied to $u_{27}$ ) | –0.003   | 0.067            |
| $u_{23}$ | H(2)⋯H'(7)  | 2.386(21) | 0.233(fixed)             | 0.014    | 0.233            |
| $u_{24}$ | H(3)⋯H(4)   | 2.463(14) | 0.167(fixed)             | 0.005    | 0.167            |
| $u_{25}$ | C(3)⋯C(5)   | 2.511(4)  | 0.073(tied to $u_{27}$ ) | –0.002   | 0.072            |
| $u_{26}$ | C(2)⋯C(4)   | 2.493(2)  | 0.064(tied to $u_{27}$ ) | –0.004   | 0.063            |
| $u_{27}$ | N(1)⋯C(3)   | 2.508(1)  | 0.064(1)                 | –0.004   | 0.064            |
| $u_{28}$ | C(2)⋯H(6)   | 2.541(16) | 0.162(tied to $u_{27}$ ) | –0.001   | 0.161            |
| $u_{29}$ | H'(3)⋯H(4)  | 2.544(14) | 0.167(fixed)             | 0.001    | 0.167            |
| $u_{30}$ | H(3)⋯H'(8)  | 2.550(23) | 0.252(fixed)             | 0.012    | 0.252            |
| $u_{31}$ | N(1)⋯C(4)   | 2.580(2)  | 0.065(tied to $u_{27}$ ) | –0.002   | 0.065            |
| $u_{32}$ | C(3)⋯H'(8)  | 2.680(17) | 0.172(tied to $u_{27}$ ) | –0.001   | 0.171            |
| $u_{33}$ | C(2)⋯H'(7)  | 2.690(14) | 0.162(tied to $u_{27}$ ) | –0.004   | 0.161            |
| $u_{34}$ | C(2)⋯C(8)   | 2.835(8)  | 0.118(5)                 | –0.008   | 0.108            |
| $u_{35}$ | C(3)⋯H(5)   | 2.824(16) | 0.185(tied to $u_{34}$ ) | –0.003   | 0.169            |
| $u_{36}$ | H'(2)⋯H(3)  | 2.947(17) | 0.161(fixed)             | –0.005   | 0.161            |
| $u_{37}$ | H(2)⋯H'(8)  | 2.974(24) | 0.406(fixed)             | –0.005   | 0.406            |
| $u_{38}$ | C(2)⋯C(5)   | 2.940(6)  | 0.088(tied to $u_{34}$ ) | –0.009   | 0.081            |
| $u_{39}$ | H(2)⋯H'(3)  | 2.977(20) | 0.140(fixed)             | –0.011   | 0.140            |
| $u_{40}$ | H(2)⋯C(8)   | 3.062(17) | 0.277(tied to $u_{34}$ ) | –0.011   | 0.254            |
| $u_{41}$ | C(2)⋯H'(8)  | 3.093(19) | 0.270(tied to $u_{34}$ ) | –0.011   | 0.248            |
| $u_{42}$ | H(2)⋯C(4)   | 3.147(11) | 0.168(tied to $u_{34}$ ) | –0.011   | 0.155            |
| $u_{43}$ | N(1)⋯H'(3)  | 3.159(11) | 0.163(tied to $u_{34}$ ) | –0.011   | 0.150            |
| $u_{44}$ | N(1)⋯H(3)   | 3.340(9)  | 0.126(5)                 | –0.014   | 0.119            |
| $u_{45}$ | C(2)⋯H(7)   | 3.317(8)  | 0.105(tied to $u_{44}$ ) | –0.012   | 0.100            |
| $u_{46}$ | C(2)⋯H'(6)  | 3.319(8)  | 0.106(tied to $u_{44}$ ) | –0.011   | 0.101            |

|                        |               |           |                                        |        |       |
|------------------------|---------------|-----------|----------------------------------------|--------|-------|
| <i>u</i> <sub>47</sub> | H'(2)···C(4)  | 3.337(8)  | 0.127(tied to <i>u</i> <sub>44</sub> ) | -0.014 | 0.121 |
| <i>u</i> <sub>48</sub> | C(3)···H'(5)  | 3.461(8)  | 0.108(tied to <i>u</i> <sub>44</sub> ) | -0.012 | 0.103 |
| <i>u</i> <sub>49</sub> | C(3)···H(8)   | 3.468(7)  | 0.109(tied to <i>u</i> <sub>44</sub> ) | -0.011 | 0.103 |
| <i>u</i> <sub>50</sub> | C(2)···H(4)   | 3.467(3)  | 0.106(tied to <i>u</i> <sub>44</sub> ) | -0.010 | 0.100 |
| <i>u</i> <sub>51</sub> | H'(2)···C(5)  | 3.461(16) | 0.210(tied to <i>u</i> <sub>44</sub> ) | -0.018 | 0.200 |
| <i>u</i> <sub>52</sub> | C(2)···H(5)   | 3.475(15) | 0.205(tied to <i>u</i> <sub>44</sub> ) | -0.017 | 0.195 |
| <i>u</i> <sub>53</sub> | H(2)···H(6)   | 3.566(19) | 0.167(fixed)                           | -0.016 | 0.167 |
| <i>u</i> <sub>54</sub> | H'(2)···H'(6) | 3.600(21) | 0.175(fixed)                           | -0.011 | 0.175 |
| <i>u</i> <sub>55</sub> | N(1)···H(4)   | 3.683(2)  | 0.102(tied to <i>u</i> <sub>44</sub> ) | -0.009 | 0.097 |
| <i>u</i> <sub>56</sub> | H'(3)···H'(5) | 3.717()   | 0.178(fixed)                           | -0.016 | 0.178 |
| <i>u</i> <sub>57</sub> | H(3)···H(5)   | 3.767(19) | 0.185(fixed)                           | -0.012 | 0.185 |
| <i>u</i> <sub>58</sub> | H'(2)···H(5)  | 3.746(22) | 0.338(fixed)                           | -0.022 | 0.338 |
| <i>u</i> <sub>59</sub> | C(2)···H(8)   | 3.881(8)  | 0.113(5)                               | -0.022 | 0.115 |
| <i>u</i> <sub>60</sub> | H'(2)···C(8)  | 3.890(7)  | 0.114(tied to <i>u</i> <sub>59</sub> ) | -0.022 | 0.115 |
| <i>u</i> <sub>61</sub> | C(2)···H'(5)  | 3.868(9)  | 0.113(tied to <i>u</i> <sub>59</sub> ) | -0.021 | 0.115 |
| <i>u</i> <sub>62</sub> | H(2)···C(5)   | 3.878(9)  | 0.114(tied to <i>u</i> <sub>59</sub> ) | -0.021 | 0.115 |
| <i>u</i> <sub>63</sub> | H(2)···H(4)   | 4.047(12) | 0.185(fixed)                           | -0.018 | 0.185 |
| <i>u</i> <sub>64</sub> | H(2)···H(8)   | 4.149(18) | 0.264(fixed)                           | -0.029 | 0.264 |
| <i>u</i> <sub>65</sub> | H'(2)···H'(8) | 4.186(19) | 0.261(fixed)                           | -0.029 | 0.261 |
| <i>u</i> <sub>66</sub> | H(2)···H'(6)  | 4.132(13) | 0.135(fixed)                           | -0.017 | 0.135 |
| <i>u</i> <sub>67</sub> | H'(2)···H(4)  | 4.254(10) | 0.150(fixed)                           | -0.022 | 0.150 |
| <i>u</i> <sub>68</sub> | H(3)···H'(5)  | 4.307(11) | 0.137(fixed)                           | -0.018 | 0.137 |
| <i>u</i> <sub>69</sub> | H'(2)···H'(5) | 4.469(15) | 0.186(fixed)                           | -0.035 | 0.186 |
| <i>u</i> <sub>70</sub> | H(2)···H(5)   | 4.497(15) | 0.182(fixed)                           | -0.035 | 0.182 |
| <i>u</i> <sub>71</sub> | H(2)···H'(5)  | 4.704(12) | 0.190(fixed)                           | -0.034 | 0.190 |
| <i>u</i> <sub>72</sub> | H'(2)···H(8)  | 4.896(8)  | 0.131(fixed)                           | -0.040 | 0.131 |

**Table S3** Least-squares correlation matrix (×100) from the GED refinement of **1**.<sup>a</sup>

|                        | <i>p</i> <sub>5</sub> | <i>p</i> <sub>8</sub> | <i>p</i> <sub>11</sub> | <i>p</i> <sub>15</sub> | <i>u</i> <sub>6</sub> | <i>u</i> <sub>34</sub> |
|------------------------|-----------------------|-----------------------|------------------------|------------------------|-----------------------|------------------------|
| <i>p</i> <sub>1</sub>  |                       |                       | 61                     |                        |                       | -55                    |
| <i>p</i> <sub>2</sub>  |                       |                       |                        |                        | 76                    |                        |
| <i>p</i> <sub>3</sub>  | 65                    | -59                   |                        |                        | -56                   |                        |
| <i>p</i> <sub>8</sub>  |                       |                       |                        | -54                    |                       |                        |
| <i>p</i> <sub>11</sub> |                       |                       |                        |                        |                       | -83                    |

<sup>a</sup> Only values ≥ 50% are shown.

**Table S4** Cartesian coordinates (in Å) for the GED refined structure ( $r_{hi}$ ) of **1**.

|       | <i>x</i> | <i>y</i> | <i>z</i> |
|-------|----------|----------|----------|
| N(1)  | 0.0000   | 0.0000   | 0.0000   |
| C(2)  | 0.0000   | 1.3802   | -0.5040  |
| H(2)  | -0.9646  | 1.8298   | -0.1760  |
| H'(2) | 0.7940   | 1.9389   | 0.0413   |
| C(3)  | 0.1478   | 1.4471   | -2.0505  |
| H(3)  | -0.5922  | 2.1131   | -2.5493  |
| H'(3) | 1.1402   | 1.8542   | -2.3497  |
| C(4)  | 0.0000   | 0.0000   | -2.5880  |
| H(4)  | 0.0000   | 0.0000   | -3.7016  |
| C(5)  | 1.1793   | -0.8516  | -2.0505  |
| H(5)  | 2.1262   | -0.5437  | -2.5493  |
| H'(5) | 1.0357   | -1.9145  | -2.3497  |
| C(6)  | 1.1952   | -0.6901  | -0.5040  |
| H(6)  | 2.0669   | -0.0795  | -0.1760  |
| H'(6) | 1.2822   | -1.6571  | 0.0413   |
| C(7)  | -1.1952  | -0.6901  | -0.5040  |
| H(7)  | -1.1023  | -1.7502  | -0.1760  |
| H'(7) | -2.0762  | -0.2818  | 0.0413   |
| C(8)  | -1.3271  | -0.5956  | -2.0505  |
| H(8)  | -1.5339  | -1.5695  | -2.5493  |
| H'(8) | -2.1759  | 0.0603   | -2.3497  |

**Table S5** Interatomic distances ( $r_a$  in Å), experimental and calculated amplitudes of vibration ( $u_{h1}$  in Å) and curvilinear corrections ( $k_{h1}$  in Å) from the SARACEN refinement of **2**. See Figure 2 for atom numbering.

|          | Atom pair     | $r_a$     | $u_{h1}$ (exp.)          | $k_{h1}$ | $u_{h1}$ (calc.) |
|----------|---------------|-----------|--------------------------|----------|------------------|
| $u_9$    | C(8)–H(8)     | 1.090(4)  | 0.091(tied to $u_7$ )    | 0.004    | 0.075            |
| $u_{10}$ | C(8)–H'(8)    | 1.090(4)  | 0.091(tied to $u_7$ )    | 0.004    | 0.075            |
| $u_1$    | C(4)–H(4)     | 1.090(4)  | 0.091(tied to $u_7$ )    | 0.004    | 0.075            |
| $u_8$    | C(7)–H(7)     | 1.090(4)  | 0.090(tied to $u_7$ )    | 0.004    | 0.074            |
| $u_7$    | C(7)–H'(7)    | 1.090(4)  | 0.090(4)                 | 0.004    | 0.074            |
| $u_{11}$ | B(9)–H(12)    | 1.218(9)  | 0.103(tied to $u_7$ )    | 0.005    | 0.085            |
| $u_{12}$ | N(1)–C(7)     | 1.489(6)  | 0.046(4)                 | 0.001    | 0.049            |
| $u_{13}$ | C(8)–C(4)     | 1.536(6)  | 0.047(tied to $u_{12}$ ) | 0.002    | 0.050            |
| $u_{14}$ | C(7)–C(8)     | 1.539(6)  | 0.048(tied to $u_{12}$ ) | 0.001    | 0.050            |
| $u_2$    | N(1)–B(9)     | 1.624(9)  | 0.062(tied to $u_{12}$ ) | 0.003    | 0.065            |
| $u_{16}$ | H(8)···H'(8)  | 1.760(26) | 0.119(fixed)             | 0.002    | 0.119            |
| $u_{15}$ | H'(7)···H(7)  | 1.768(28) | 0.118(fixed)             | 0.002    | 0.118            |
| $u_{17}$ | H(12)···H(11) | 2.030(19) | 0.132(fixed)             | 0.001    | 0.132            |
| $u_{18}$ | N(1)···H(7)   | 2.072(14) | 0.078(9)                 | 0.000    | 0.100            |
| $u_{19}$ | N(1)···H'(7)  | 2.080(14) | 0.079(tied to $u_{18}$ ) | 0.000    | 0.100            |
| $u_{24}$ | C(7)···H'(8)  | 2.107(32) | 0.081(tied to $u_{18}$ ) | 0.000    | 0.103            |
| $u_{25}$ | H(7)···C(8)   | 2.125(29) | 0.080(tied to $u_{18}$ ) | 0.000    | 0.103            |
| $u_{20}$ | H'(8)···C(4)  | 2.167(14) | 0.081(tied to $u_{18}$ ) | 0.000    | 0.104            |
| $u_{21}$ | C(8)···H(4)   | 2.172(9)  | 0.080(tied to $u_{18}$ ) | 0.002    | 0.102            |
| $u_{22}$ | H(8)···C(4)   | 2.178(14) | 0.082(tied to $u_{18}$ ) | 0.000    | 0.105            |
| $u_{23}$ | C(7)···H(8)   | 2.219(28) | 0.081(tied to $u_{18}$ ) | 0.000    | 0.103            |
| $u_{26}$ | H'(7)···C(8)  | 2.267(30) | 0.080(tied to $u_{18}$ ) | 0.001    | 0.102            |
| $u_{27}$ | N(1)···H(12)  | 2.278(16) | 0.090(tied to $u_{18}$ ) | –0.001   | 0.116            |
| $u_{28}$ | H(7)···H(8)   | 2.323(37) | 0.165(fixed)             | 0.018    | 0.165            |
| $u_{29}$ | H'(7)···H'(8) | 2.361(40) | 0.167(fixed)             | 0.017    | 0.167            |
| $u_{30}$ | H'(7)···H(6)  | 2.407(38) | 0.220(fixed)             | 0.021    | 0.220            |
| $u_{32}$ | H'(7)···H(10) | 2.414(39) | 0.236(fixed)             | 0.038    | 0.236            |
| $u_{31}$ | C(7)···C(2)   | 2.424(12) | 0.092(tied to $u_{36}$ ) | –0.004   | 0.066            |
| $u_{33}$ | H(8)···H(4)   | 2.458(22) | 0.160(fixed)             | 0.008    | 0.160            |
| $u_{36}$ | N(1)···C(8)   | 2.482(11) | 0.084(3)                 | –0.007   | 0.060            |
| $u_{34}$ | H(7)···H(11)  | 2.487(38) | 0.231(fixed)             | 0.038    | 0.231            |
| $u_{35}$ | C(8)···C(3)   | 2.488(12) | 0.095(tied to $u_{36}$ ) | –0.004   | 0.068            |
| $u_{37}$ | C(7)···C(4)   | 2.489(16) | 0.085(tied to $u_{36}$ ) | –0.006   | 0.061            |
| $u_{40}$ | C(7)···H(6)   | 2.515(24) | 0.225(tied to $u_{36}$ ) | 0.000    | 0.160            |
| $u_{41}$ | C(7)···B(9)   | 2.542(10) | 0.115(tied to $u_{36}$ ) | 0.004    | 0.082            |
| $u_3$    | N(1)···C(4)   | 2.560(11) | 0.083(tied to $u_{36}$ ) | –0.002   | 0.059            |
| $u_{38}$ | H'(8)···H(4)  | 2.566(21) | 0.163(fixed)             | 0.004    | 0.163            |
| $u_{39}$ | H'(8)···H(5)  | 2.566(38) | 0.234(fixed)             | 0.017    | 0.234            |
| $u_{42}$ | H'(7)···B(9)  | 2.583(24) | 0.212(tied to $u_{36}$ ) | 0.012    | 0.151            |
| $u_{43}$ | C(8)···H'(3)  | 2.641(23) | 0.231(tied to $u_{36}$ ) | –0.001   | 0.165            |
| $u_{46}$ | C(7)···H(11)  | 2.708(24) | 0.256(tied to $u_{52}$ ) | 0.008    | 0.176            |
| $u_{44}$ | C(7)···H'(2)  | 2.722(23) | 0.233(tied to $u_{52}$ ) | –0.003   | 0.161            |
| $u_{45}$ | H(7)···B(9)   | 2.771(26) | 0.233(tied to $u_{52}$ ) | 0.007    | 0.161            |
| $u_{51}$ | H'(7)···H(11) | 2.795(42) | 0.286(fixed)             | 0.005    | 0.286            |
| $u_{54}$ | H(7)···H'(3)  | 2.813(84) | 0.483(fixed)             | –0.012   | 0.483            |
| $u_{47}$ | C(8)···H(5)   | 2.815(23) | 0.239(tied to $u_{52}$ ) | –0.003   | 0.165            |

|                        |               |           |                                        |        |       |
|------------------------|---------------|-----------|----------------------------------------|--------|-------|
| <i>u</i> <sub>49</sub> | C(7)···H(10)  | 2.817(26) | 0.259(tied to <i>u</i> <sub>52</sub> ) | 0.005  | 0.179 |
| <i>u</i> <sub>48</sub> | C(7)···C(3)   | 2.831(30) | 0.169(tied to <i>u</i> <sub>36</sub> ) | -0.012 | 0.121 |
| <i>u</i> <sub>53</sub> | H(7)···H'(8)  | 2.864(50) | 0.208(tied to <i>u</i> <sub>52</sub> ) | -0.011 | 0.143 |
| <i>u</i> <sub>52</sub> | C(7)···C(5)   | 2.928(21) | 0.129(8)                               | -0.014 | 0.089 |
| <i>u</i> <sub>50</sub> | H'(7)···H(8)  | 2.932(49) | 0.161(fixed)                           | -0.005 | 0.161 |
| <i>u</i> <sub>55</sub> | H(7)···C(3)   | 2.956(59) | 0.424(tied to <i>u</i> <sub>52</sub> ) | -0.017 | 0.293 |
| <i>u</i> <sub>56</sub> | C(7)···H'(3)  | 3.011(56) | 0.408(tied to <i>u</i> <sub>52</sub> ) | -0.016 | 0.282 |
| <i>u</i> <sub>58</sub> | H(7)···C(4)   | 3.068(32) | 0.234(tied to <i>u</i> <sub>52</sub> ) | -0.015 | 0.161 |
| <i>u</i> <sub>57</sub> | N(1)···H'(8)  | 3.072(25) | 0.223(tied to <i>u</i> <sub>52</sub> ) | -0.015 | 0.154 |
| <i>u</i> <sub>59</sub> | H(7)···H(10)  | 3.268(40) | 0.281(fixed)                           | -0.008 | 0.281 |
| <i>u</i> <sub>60</sub> | N(1)···H(8)   | 3.308(20) | 0.124(7)                               | -0.018 | 0.123 |
| <i>u</i> <sub>62</sub> | C(7)···H'(6)  | 3.332(15) | 0.099(tied to <i>u</i> <sub>60</sub> ) | -0.011 | 0.098 |
| <i>u</i> <sub>63</sub> | C(7)···H(2)   | 3.332(15) | 0.098(tied to <i>u</i> <sub>60</sub> ) | -0.013 | 0.098 |
| <i>u</i> <sub>61</sub> | H'(7)···C(4)  | 3.347(22) | 0.129(tied to <i>u</i> <sub>60</sub> ) | -0.018 | 0.128 |
| <i>u</i> <sub>64</sub> | C(8)···H'(5)  | 3.432(14) | 0.100(tied to <i>u</i> <sub>60</sub> ) | -0.013 | 0.099 |
| <i>u</i> <sub>65</sub> | C(8)···H(3)   | 3.442(13) | 0.100(tied to <i>u</i> <sub>60</sub> ) | -0.011 | 0.099 |
| <i>u</i> <sub>67</sub> | C(7)···H(4)   | 3.444(18) | 0.098(tied to <i>u</i> <sub>60</sub> ) | -0.012 | 0.097 |
| <i>u</i> <sub>68</sub> | C(7)···H(5)   | 3.459(35) | 0.231(tied to <i>u</i> <sub>60</sub> ) | -0.024 | 0.229 |
| <i>u</i> <sub>66</sub> | H'(7)···C(5)  | 3.462(38) | 0.238(tied to <i>u</i> <sub>60</sub> ) | -0.025 | 0.236 |
| <i>u</i> <sub>69</sub> | C(7)···H(12)  | 3.542(14) | 0.113(tied to <i>u</i> <sub>60</sub> ) | -0.013 | 0.112 |
| <i>u</i> <sub>70</sub> | H(7)···H(2)   | 3.545(24) | 0.161(fixed)                           | -0.017 | 0.161 |
| <i>u</i> <sub>71</sub> | H'(7)···H'(2) | 3.587(25) | 0.166(fixed)                           | -0.010 | 0.166 |
| <i>u</i> <sub>4</sub>  | N(1)···H(4)   | 3.648(12) | 0.092(tied to <i>u</i> <sub>60</sub> ) | -0.008 | 0.091 |
| <i>u</i> <sub>73</sub> | H'(8)···H'(3) | 3.692(23) | 0.169(fixed)                           | -0.016 | 0.169 |
| <i>u</i> <sub>75</sub> | H'(7)···H(12) | 3.714(25) | 0.163(fixed)                           | -0.013 | 0.163 |
| <i>u</i> <sub>72</sub> | H'(7)···H(5)  | 3.752(54) | 0.414(fixed)                           | -0.031 | 0.414 |
| <i>u</i> <sub>74</sub> | H(8)···H(3)   | 3.757(24) | 0.173(fixed)                           | -0.011 | 0.173 |
| <i>u</i> <sub>76</sub> | H(7)···H(12)  | 3.782(28) | 0.172(fixed)                           | -0.014 | 0.172 |
| <i>u</i> <sub>79</sub> | H(7)···C(5)   | 3.812(16) | 0.147(tied to <i>u</i> <sub>81</sub> ) | -0.029 | 0.109 |
| <i>u</i> <sub>80</sub> | C(7)···H'(5)  | 3.824(16) | 0.146(tied to <i>u</i> <sub>81</sub> ) | -0.028 | 0.108 |
| <i>u</i> <sub>78</sub> | C(7)···H(3)   | 3.869(29) | 0.155(tied to <i>u</i> <sub>81</sub> ) | -0.029 | 0.115 |
| <i>u</i> <sub>77</sub> | H'(7)···C(3)  | 3.871(26) | 0.153(tied to <i>u</i> <sub>81</sub> ) | -0.030 | 0.114 |
| <i>u</i> <sub>81</sub> | C(8)···B(9)   | 3.917(11) | 0.112(6)                               | -0.008 | 0.083 |
| <i>u</i> <sub>82</sub> | H(7)···H(4)   | 3.954(36) | 0.192(fixed)                           | -0.021 | 0.192 |
| <i>u</i> <sub>84</sub> | H(7)···H(3)   | 4.052(61) | 0.294(fixed)                           | -0.039 | 0.294 |
| <i>u</i> <sub>85</sub> | H'(7)···H'(3) | 4.114(57) | 0.285(fixed)                           | -0.040 | 0.285 |
| <i>u</i> <sub>83</sub> | H'(7)···H(2)  | 4.120(23) | 0.131(fixed)                           | -0.015 | 0.131 |
| <i>u</i> <sub>88</sub> | C(8)···H(11)  | 4.174(28) | 0.194(tied to <i>u</i> <sub>5</sub> )  | -0.010 | 0.165 |
| <i>u</i> <sub>5</sub>  | C(4)···B(9)   | 4.182(13) | 0.092(7)                               | -0.003 | 0.078 |
| <i>u</i> <sub>87</sub> | C(8)···H(10)  | 4.196(26) | 0.199(tied to <i>u</i> <sub>5</sub> )  | -0.009 | 0.169 |
| <i>u</i> <sub>86</sub> | H'(7)···H(4)  | 4.252(26) | 0.156(fixed)                           | -0.025 | 0.156 |
| <i>u</i> <sub>89</sub> | H(8)···H'(5)  | 4.289(22) | 0.132(fixed)                           | -0.016 | 0.132 |
| <i>u</i> <sub>92</sub> | H'(8)···H(10) | 4.388(40) | 0.263(fixed)                           | -0.010 | 0.263 |
| <i>u</i> <sub>93</sub> | H'(8)···B(9)  | 4.391(28) | 0.214(tied to <i>u</i> <sub>5</sub> )  | -0.018 | 0.182 |
| <i>u</i> <sub>90</sub> | H'(7)···H'(5) | 4.424(35) | 0.208(fixed)                           | -0.047 | 0.208 |
| <i>u</i> <sub>91</sub> | H(7)···H(5)   | 4.436(28) | 0.201(fixed)                           | -0.047 | 0.201 |
| <i>u</i> <sub>97</sub> | H(7)···H'(5)  | 4.601(23) | 0.194(fixed)                           | -0.044 | 0.194 |
| <i>u</i> <sub>94</sub> | H(8)···B(9)   | 4.652(23) | 0.169(tied to <i>u</i> <sub>5</sub> )  | -0.022 | 0.144 |
| <i>u</i> <sub>96</sub> | C(4)···H(12)  | 4.656(20) | 0.166(tied to <i>u</i> <sub>5</sub> )  | -0.010 | 0.141 |
| <i>u</i> <sub>95</sub> | H(8)···H(11)  | 4.671(37) | 0.231(fixed)                           | -0.016 | 0.231 |

|           |               |           |                       |        |       |
|-----------|---------------|-----------|-----------------------|--------|-------|
| $u_{98}$  | C(8)···H(12)  | 4.744(17) | 0.144(tied to $u_5$ ) | -0.022 | 0.123 |
| $u_{100}$ | H'(8)···H(11) | 4.777(39) | 0.213(fixed)          | -0.025 | 0.213 |
| $u_{99}$  | H'(7)···H(3)  | 4.870(24) | 0.132(fixed)          | -0.052 | 0.132 |
| $u_{101}$ | H(8)···H(10)  | 5.015(36) | 0.198(fixed)          | -0.027 | 0.198 |
| $u_{102}$ | H'(8)···H(12) | 5.266(32) | 0.213(fixed)          | -0.034 | 0.213 |
| $u_6$     | H(4)···B(9)   | 5.268(14) | 0.123(tied to $u_5$ ) | -0.010 | 0.105 |
| $u_{103}$ | H(8)···H(12)  | 5.514(27) | 0.175(fixed)          | -0.038 | 0.175 |
| $u_{104}$ | H(4)···H(12)  | 5.715(21) | 0.162(fixed)          | -0.017 | 0.162 |

---

**Table S6** Interatomic distances ( $r_a$  in Å), experimental and calculated amplitudes of vibration ( $u_{h1}$  in Å) and curvilinear corrections ( $k_{h1}$  in Å) from the SARACEN refinement of **3**. See Figure 2 for atom numbering.

|          | Atom pair     | $r_a$     | $u_{h1}$ (exp.)          | $k_{h1}$ | $u_{h1}$ (calc.) |
|----------|---------------|-----------|--------------------------|----------|------------------|
| $u_{10}$ | C(8)–H'(8)    | 1.107(1)  | 0.097(1)                 | 0.004    | 0.075            |
| $u_9$    | C(8)–H(8)     | 1.107(1)  | 0.097(tied to $u_{10}$ ) | 0.004    | 0.075            |
| $u_7$    | C(7)–H'(7)    | 1.107(1)  | 0.096(tied to $u_{10}$ ) | 0.004    | 0.074            |
| $u_8$    | C(7)–H(7)     | 1.107(1)  | 0.096(tied to $u_{10}$ ) | 0.004    | 0.074            |
| $u_1$    | C(4)–H(4)     | 1.107(1)  | 0.097(tied to $u_{10}$ ) | 0.004    | 0.075            |
| $u_{11}$ | N(1)–C(7)     | 1.481(2)  | 0.060(1)                 | 0.001    | 0.049            |
| $u_{12}$ | C(8)–C(4)     | 1.528(2)  | 0.061(tied to $u_{11}$ ) | 0.002    | 0.050            |
| $u_{13}$ | C(7)–C(8)     | 1.535(2)  | 0.062(tied to $u_{11}$ ) | 0.001    | 0.051            |
| $u_{14}$ | Al(9)–H(12)   | 1.585(7)  | 0.116(tied to $u_{11}$ ) | 0.004    | 0.095            |
| $u_{16}$ | H(8)···H'(8)  | 1.770(20) | 0.119(fixed)             | 0.003    | 0.119            |
| $u_{15}$ | H'(7)···H(7)  | 1.792(18) | 0.118(fixed)             | 0.003    | 0.118            |
| $u_2$    | N(1)–Al(9)    | 2.033(5)  | 0.082(2)                 | 0.003    | 0.075            |
| $u_{17}$ | N(1)···H(7)   | 2.096(12) | 0.110(tied to $u_2$ )    | 0.001    | 0.100            |
| $u_{18}$ | N(1)···H'(7)  | 2.113(12) | 0.111(tied to $u_2$ )    | 0.001    | 0.101            |
| $u_{24}$ | H(7)···C(8)   | 2.150(20) | 0.113(tied to $u_2$ )    | 0.001    | 0.103            |
| $u_{19}$ | H'(8)···C(4)  | 2.165(13) | 0.114(tied to $u_2$ )    | 0.001    | 0.104            |
| $u_{21}$ | H(8)···C(4)   | 2.177(13) | 0.116(tied to $u_2$ )    | 0.001    | 0.105            |
| $u_{20}$ | C(8)···H(4)   | 2.179(3)  | 0.113(tied to $u_2$ )    | 0.005    | 0.103            |
| $u_{23}$ | C(7)···H'(8)  | 2.181(19) | 0.113(tied to $u_2$ )    | 0.001    | 0.103            |
| $u_{25}$ | H'(7)···C(8)  | 2.198(15) | 0.112(tied to $u_2$ )    | 0.002    | 0.102            |
| $u_{22}$ | C(7)···H(8)   | 2.215(18) | 0.114(tied to $u_2$ )    | 0.001    | 0.104            |
| $u_{26}$ | H(7)···H(8)   | 2.349(33) | 0.168(fixed)             | 0.029    | 0.168            |
| $u_{27}$ | H'(7)···H'(8) | 2.368(28) | 0.169(fixed)             | 0.029    | 0.169            |
| $u_{29}$ | C(7)···C(2)   | 2.373(5)  | 0.073(tied to $u_{32}$ ) | –0.007   | 0.067            |
| $u_{28}$ | H'(7)···H(6)  | 2.438(27) | 0.228(fixed)             | 0.033    | 0.228            |
| $u_{33}$ | C(7)···C(4)   | 2.459(6)  | 0.067(tied to $u_{32}$ ) | –0.011   | 0.062            |
| $u_{30}$ | H(8)···H(4)   | 2.462(19) | 0.163(fixed)             | 0.014    | 0.163            |
| $u_{31}$ | C(8)···C(3)   | 2.474(3)  | 0.076(tied to $u_{32}$ ) | –0.006   | 0.070            |
| $u_{32}$ | N(1)···C(8)   | 2.509(5)  | 0.067(4)                 | –0.011   | 0.062            |
| $u_{36}$ | C(7)···H(6)   | 2.512(18) | 0.190(tied to $u_{32}$ ) | 0.000    | 0.176            |
| $u_{34}$ | H'(8)···H(4)  | 2.566(19) | 0.170(fixed)             | 0.009    | 0.170            |
| $u_{35}$ | H(8)···H'(3)  | 2.570(30) | 0.242(fixed)             | 0.026    | 0.242            |
| $u_3$    | N(1)···C(4)   | 2.603(6)  | 0.066(tied to $u_{32}$ ) | –0.002   | 0.060            |
| $u_{38}$ | C(8)···H'(3)  | 2.646(19) | 0.192(tied to $u_{32}$ ) | –0.001   | 0.177            |
| $u_{51}$ | H(7)···H'(3)  | 2.651(33) | 0.622(fixed)             | –0.024   | 0.622            |
| $u_{39}$ | H(12)···H(11) | 2.699(15) | 0.157(fixed)             | –0.001   | 0.157            |
| $u_{37}$ | C(7)···H'(2)  | 2.725(15) | 0.211(tied to $u_{46}$ ) | –0.004   | 0.178            |
| $u_{43}$ | C(7)···C(3)   | 2.748(10) | 0.160(tied to $u_{32}$ ) | –0.022   | 0.147            |
| $u_{40}$ | H'(7)···H(10) | 2.775(39) | 0.328(fixed)             | 0.069    | 0.328            |
| $u_{45}$ | N(1)···H(12)  | 2.780(16) | 0.188(tied to $u_{46}$ ) | –0.003   | 0.158            |
| $u_{42}$ | C(8)···H(5)   | 2.818(18) | 0.212(tied to $u_{46}$ ) | –0.004   | 0.179            |
| $u_{44}$ | H'(7)···H(8)  | 2.841(27) | 0.177(fixed)             | –0.006   | 0.177            |
| $u_{41}$ | H(7)···H(11)  | 2.857(35) | 0.323(fixed)             | 0.068    | 0.323            |
| $u_{52}$ | H(7)···C(3)   | 2.873(25) | 0.369(fixed)             | –0.028   | 0.369            |
| $u_{47}$ | C(7)···C(5)   | 2.919(4)  | 0.129(tied to $u_{46}$ ) | –0.025   | 0.109            |
| $u_{53}$ | C(7)···H'(3)  | 2.929(26) | 0.420(tied to $u_{46}$ ) | –0.028   | 0.353            |



|                        |               |           |                                        |        |       |
|------------------------|---------------|-----------|----------------------------------------|--------|-------|
| <i>u</i> <sub>46</sub> | C(7)···Al(9)  | 2.930(3)  | 0.124(2)                               | 0.007  | 0.105 |
| <i>u</i> <sub>49</sub> | H'(7)···Al(9) | 2.955(19) | 0.221(tied to <i>u</i> <sub>46</sub> ) | 0.023  | 0.186 |
| <i>u</i> <sub>48</sub> | H(7)···H'(8)  | 2.961(20) | 0.157(fixed)                           | -0.015 | 0.157 |
| <i>u</i> <sub>55</sub> | H(7)···C(4)   | 3.041(21) | 0.221(tied to <i>u</i> <sub>46</sub> ) | -0.023 | 0.186 |
| <i>u</i> <sub>54</sub> | N(1)···H'(8)  | 3.123(22) | 0.209(tied to <i>u</i> <sub>46</sub> ) | -0.022 | 0.176 |
| <i>u</i> <sub>50</sub> | H(7)···Al(9)  | 3.140(22) | 0.240(tied to <i>u</i> <sub>46</sub> ) | 0.013  | 0.202 |
| <i>u</i> <sub>56</sub> | C(7)···H(11)  | 3.171(27) | 0.303(tied to <i>u</i> <sub>46</sub> ) | 0.013  | 0.255 |
| <i>u</i> <sub>62</sub> | H'(7)···H(11) | 3.263(41) | 0.395(fixed)                           | 0.007  | 0.395 |
| <i>u</i> <sub>57</sub> | C(7)···H(10)  | 3.263(28) | 0.232(tied to <i>u</i> <sub>58</sub> ) | 0.009  | 0.255 |
| <i>u</i> <sub>59</sub> | H'(7)···C(4)  | 3.309(11) | 0.134(tied to <i>u</i> <sub>58</sub> ) | -0.028 | 0.148 |
| <i>u</i> <sub>60</sub> | C(7)···H(2)   | 3.313(8)  | 0.090(tied to <i>u</i> <sub>58</sub> ) | -0.018 | 0.099 |
| <i>u</i> <sub>61</sub> | C(7)···H'(6)  | 3.330(8)  | 0.090(tied to <i>u</i> <sub>58</sub> ) | -0.015 | 0.099 |
| <i>u</i> <sub>58</sub> | N(1)···H(8)   | 3.350(15) | 0.128(5)                               | -0.027 | 0.141 |
| <i>u</i> <sub>65</sub> | C(8)···H'(5)  | 3.429(9)  | 0.091(tied to <i>u</i> <sub>58</sub> ) | -0.017 | 0.100 |
| <i>u</i> <sub>67</sub> | C(7)···H(4)   | 3.432(6)  | 0.090(tied to <i>u</i> <sub>58</sub> ) | -0.016 | 0.099 |
| <i>u</i> <sub>66</sub> | C(8)···H(3)   | 3.437(9)  | 0.091(tied to <i>u</i> <sub>58</sub> ) | -0.015 | 0.100 |
| <i>u</i> <sub>63</sub> | H'(7)···C(5)  | 3.476(15) | 0.278(tied to <i>u</i> <sub>58</sub> ) | -0.042 | 0.306 |
| <i>u</i> <sub>64</sub> | C(7)···H(5)   | 3.484(18) | 0.266(tied to <i>u</i> <sub>58</sub> ) | -0.040 | 0.293 |
| <i>u</i> <sub>68</sub> | H(7)···H(2)   | 3.564(19) | 0.166(fixed)                           | -0.022 | 0.166 |
| <i>u</i> <sub>69</sub> | H'(7)···H'(2) | 3.648(20) | 0.170(fixed)                           | -0.012 | 0.170 |
| <i>u</i> <sub>72</sub> | H'(8)···H'(3) | 3.696(20) | 0.174(fixed)                           | -0.021 | 0.174 |
| <i>u</i> <sub>70</sub> | H(7)···H(10)  | 3.699(39) | 0.389(fixed)                           | -0.013 | 0.389 |
| <i>u</i> <sub>4</sub>  | N(1)···H(4)   | 3.708(6)  | 0.091(tied to <i>u</i> <sub>76</sub> ) | -0.008 | 0.092 |
| <i>u</i> <sub>73</sub> | H(8)···H(3)   | 3.757(22) | 0.178(fixed)                           | -0.013 | 0.178 |
| <i>u</i> <sub>71</sub> | H'(7)···H(5)  | 3.766(24) | 0.545(fixed)                           | -0.053 | 0.545 |
| <i>u</i> <sub>74</sub> | C(7)···H(3)   | 3.804(11) | 0.123(tied to <i>u</i> <sub>76</sub> ) | -0.046 | 0.124 |
| <i>u</i> <sub>76</sub> | H(7)···C(5)   | 3.805(14) | 0.112(5)                               | -0.047 | 0.113 |
| <i>u</i> <sub>75</sub> | H'(7)···C(3)  | 3.809(9)  | 0.122(tied to <i>u</i> <sub>76</sub> ) | -0.048 | 0.123 |
| <i>u</i> <sub>77</sub> | C(7)···H'(5)  | 3.822(12) | 0.111(tied to <i>u</i> <sub>76</sub> ) | -0.046 | 0.112 |
| <i>u</i> <sub>78</sub> | H(7)···H(4)   | 3.929(23) | 0.218(fixed)                           | -0.030 | 0.218 |
| <i>u</i> <sub>81</sub> | H(7)···H(3)   | 3.948(26) | 0.360(fixed)                           | -0.063 | 0.360 |
| <i>u</i> <sub>83</sub> | H'(7)···H'(3) | 4.020(27) | 0.347(fixed)                           | -0.065 | 0.347 |
| <i>u</i> <sub>79</sub> | C(7)···H(12)  | 4.078(14) | 0.145(tied to <i>u</i> <sub>76</sub> ) | -0.023 | 0.146 |
| <i>u</i> <sub>80</sub> | H'(7)···H(2)  | 4.168(17) | 0.131(fixed)                           | -0.015 | 0.131 |
| <i>u</i> <sub>82</sub> | H'(7)···H(4)  | 4.217(13) | 0.176(fixed)                           | -0.037 | 0.176 |
| <i>u</i> <sub>84</sub> | H(8)···H'(5)  | 4.295(19) | 0.133(fixed)                           | -0.017 | 0.133 |
| <i>u</i> <sub>85</sub> | H'(7)···H(12) | 4.295(22) | 0.197(fixed)                           | -0.022 | 0.197 |
| <i>u</i> <sub>87</sub> | C(8)···Al(9)  | 4.328(4)  | 0.161(4)                               | -0.016 | 0.101 |
| <i>u</i> <sub>86</sub> | H(7)···H(12)  | 4.349(26) | 0.210(fixed)                           | -0.025 | 0.210 |
| <i>u</i> <sub>89</sub> | H(7)···H(5)   | 4.455(19) | 0.246(fixed)                           | -0.075 | 0.246 |
| <i>u</i> <sub>88</sub> | H'(7)···H'(5) | 4.457(17) | 0.259(fixed)                           | -0.075 | 0.259 |
| <i>u</i> <sub>90</sub> | C(8)···H(10)  | 4.582(26) | 0.273(tied to <i>u</i> <sub>5</sub> )  | -0.014 | 0.248 |
| <i>u</i> <sub>92</sub> | H(7)···H'(5)  | 4.585(17) | 0.221(fixed)                           | -0.070 | 0.221 |
| <i>u</i> <sub>5</sub>  | C(4)···Al(9)  | 4.631(6)  | 0.096(4)                               | -0.007 | 0.088 |
| <i>u</i> <sub>91</sub> | C(8)···H(11)  | 4.640(26) | 0.267(tied to <i>u</i> <sub>5</sub> )  | -0.017 | 0.243 |
| <i>u</i> <sub>94</sub> | H'(8)···H(10) | 4.720(40) | 0.364(fixed)                           | -0.010 | 0.364 |
| <i>u</i> <sub>95</sub> | H'(8)···Al(9) | 4.808(25) | 0.242(tied to <i>u</i> <sub>5</sub> )  | -0.030 | 0.220 |
| <i>u</i> <sub>93</sub> | H'(7)···H(3)  | 4.827(10) | 0.146(fixed)                           | -0.080 | 0.146 |
| <i>u</i> <sub>96</sub> | H(8)···Al(9)  | 5.063(18) | 0.192(tied to <i>u</i> <sub>5</sub> )  | -0.036 | 0.175 |
| <i>u</i> <sub>97</sub> | H(8)···H(11)  | 5.080(34) | 0.332(fixed)                           | -0.022 | 0.332 |

|           |               |           |                       |        |       |
|-----------|---------------|-----------|-----------------------|--------|-------|
| $u_{98}$  | C(4)···H(12)  | 5.141(20) | 0.220(tied to $u_5$ ) | -0.015 | 0.201 |
| $u_{99}$  | C(8)···H(12)  | 5.269(17) | 0.181(tied to $u_5$ ) | -0.040 | 0.165 |
| $u_{100}$ | H'(8)···H(11) | 5.292(36) | 0.285(fixed)          | -0.042 | 0.285 |
| $u_{101}$ | H(8)···H(10)  | 5.391(34) | 0.278(fixed)          | -0.043 | 0.278 |
| $u_6$     | H(4)···Al(9)  | 5.733(6)  | 0.123(tied to $u_5$ ) | -0.015 | 0.112 |
| $u_{102}$ | H'(8)···H(12) | 5.783(32) | 0.275(fixed)          | -0.059 | 0.275 |
| $u_{103}$ | H(8)···H(12)  | 6.069(23) | 0.229(fixed)          | -0.067 | 0.229 |
| $u_{104}$ | H(4)···H(12)  | 6.202(21) | 0.221(fixed)          | -0.024 | 0.221 |

**Table S7** Least-squares correlation matrix ( $\times 100$ ) from the GED refinement of **2**.<sup>a</sup>

|          | $p_2$ | $p_4$ | $p_{13}$ | $p_{19}$ | $u_{14}$ | $u_{30}$ | $u_{50}$ | $u_{57}$ | $u_{79}$ | $k_1$ | $k_2$ |
|----------|-------|-------|----------|----------|----------|----------|----------|----------|----------|-------|-------|
| $p_1$    | 76    |       |          |          |          |          |          |          |          |       |       |
| $p_3$    |       | -91   |          |          |          |          |          |          |          |       |       |
| $p_5$    |       |       |          |          | 62       |          |          |          |          |       |       |
| $p_7$    |       |       | -71      | -63      |          |          |          |          |          |       |       |
| $p_{19}$ |       |       |          |          |          | -68      |          | 65       |          |       |       |
| $u_{14}$ |       |       |          |          |          |          | 61       |          |          |       | 60    |
| $u_{50}$ |       |       |          |          |          |          |          |          |          | 53    | 59    |
| $u_{57}$ |       |       |          |          |          |          |          |          | 50       |       |       |
| $k_1$    |       |       |          |          |          |          |          |          |          |       | 53    |

<sup>a</sup> Only values  $\geq 50\%$  are shown;  $k_1$  and  $k_2$  are scale factors.

**Table S8** Cartesian coordinates (in Å) for the GED-refined structure ( $r_{h1}$ ) of **2**.

|       | $x$     | $y$     | $z$     |
|-------|---------|---------|---------|
| N(1)  | 0.0000  | 0.0000  | 0.0000  |
| C(2)  | 1.2155  | -0.7017 | -0.4979 |
| H(2)  | 1.0756  | -1.7575 | -0.2484 |
| H'(2) | 2.0572  | -0.3175 | 0.0854  |
| C(3)  | 1.3003  | -0.6205 | -2.0322 |
| H(3)  | 1.5026  | -1.5794 | -2.5181 |
| H'(3) | 2.1451  | 0.0422  | -2.2406 |
| C(4)  | 0.0000  | 0.0000  | -2.5644 |
| H(4)  | 0.0000  | 0.0000  | -3.6582 |
| C(5)  | -1.1875 | -0.8158 | -2.0322 |
| H(5)  | -2.1190 | -0.5116 | -2.5181 |
| H'(5) | -1.0360 | -1.8788 | -2.2406 |
| C(6)  | -1.2155 | -0.7017 | -0.4979 |
| H(6)  | -2.0598 | -0.0528 | -0.2484 |
| H'(6) | -1.3036 | -1.6228 | 0.0854  |
| C(7)  | 0.0000  | 1.4035  | -0.4979 |
| H(7)  | 0.9842  | 1.8102  | -0.2484 |
| H'(7) | -0.7536 | 1.9403  | 0.0854  |
| C(8)  | -0.1127 | 1.4363  | -2.0322 |
| H(8)  | 0.6165  | 2.0909  | -2.5181 |
| H'(8) | -1.1091 | 1.8366  | -2.2406 |
| B(9)  | 0.0000  | 0.0000  | 1.6226  |
| H(10) | -1.0764 | 0.4736  | 1.9562  |
| H(11) | 0.9484  | 0.6954  | 1.9562  |
| H(12) | 0.1281  | -1.1690 | 1.9562  |

**Table S9** Least-squares correlation matrix ( $\times 100$ ) from the GED refinement of **3**.<sup>a</sup>

|          | $p_3$ | $p_4$ | $p_7$ | $p_{19}$ | $u_1$ | $u_{29}$ | $u_{47}$ | $u_{59}$ | $u_{73}$ | $u_{90}$ | $k_2$ |
|----------|-------|-------|-------|----------|-------|----------|----------|----------|----------|----------|-------|
| $p_1$    |       | -50   | -80   | 66       | 76    |          | 70       | 62       |          |          |       |
| $p_2$    | -90   |       |       |          |       |          |          |          |          |          |       |
| $p_4$    |       |       |       |          |       | 74       |          |          |          |          |       |
| $p_6$    |       |       |       |          |       |          |          |          |          |          | 55    |
| $p_7$    |       |       |       | -62      | -67   |          | -95      | -77      |          |          |       |
| $p_{10}$ |       |       |       |          |       |          |          |          | -56      |          |       |
| $p_{19}$ |       |       |       |          | 58    |          | 60       | 70       |          |          |       |
| $u_1$    |       |       |       |          |       |          | 63       | 57       |          |          |       |
| $u_6$    |       |       |       |          |       |          |          |          |          | 52       |       |
| $u_{12}$ |       |       |       |          |       |          |          |          |          |          | 50    |
| $u_{29}$ |       |       |       |          |       |          |          |          |          |          | 52    |
| $u_{47}$ |       |       |       |          |       |          |          | 76       |          |          |       |

<sup>a</sup> Only values  $\geq 50\%$  are shown;  $k_2$  is a scale factor.

**Table S10** Cartesian coordinates (in Å) for the GED-refined structure ( $r_{hl}$ ) of **3**.

|       | $x$     | $y$     | $z$     |
|-------|---------|---------|---------|
| N(1)  | 0.0000  | 0.0000  | 0.0000  |
| C(2)  | 1.1908  | -0.6875 | -0.5527 |
| H(2)  | 1.0809  | -1.7706 | -0.3307 |
| H'(2) | 2.0932  | -0.3187 | -0.0196 |
| C(3)  | 1.3314  | -0.5304 | -2.0744 |
| H(3)  | 1.6033  | -1.4793 | -2.5845 |
| H'(3) | 2.1420  | 0.1908  | -2.3140 |
| C(4)  | 0.0000  | 0.0000  | -2.6063 |
| H(4)  | 0.0000  | 0.0000  | -3.7174 |
| C(5)  | -1.1250 | -0.8878 | -2.0744 |
| H(5)  | -2.0828 | -0.6488 | -2.5845 |
| H'(5) | -0.9057 | -1.9504 | -2.3140 |
| C(6)  | -1.1908 | -0.6875 | -0.5527 |
| H(6)  | -2.0739 | -0.0507 | -0.3307 |
| H'(6) | -1.3226 | -1.6534 | -0.0196 |
| C(7)  | 0.0000  | 1.3750  | -0.5527 |
| H(7)  | 0.9930  | 1.8214  | -0.3307 |
| H'(7) | -0.7706 | 1.9721  | -0.0196 |
| C(8)  | -0.2064 | 1.4182  | -2.0744 |
| H(8)  | 0.4795  | 2.1281  | -2.5845 |
| H'(8) | -1.2362 | 1.7596  | -2.3140 |
| Al(9) | 0.0000  | 0.0000  | 2.0330  |
| H(10) | -1.4080 | 0.6804  | 2.3168  |
| H(11) | 1.2932  | 0.8792  | 2.3168  |
| H(12) | 0.1148  | -1.5595 | 2.3168  |

**Table S11** Atomic coordinates and equivalent isotropic thermal parameters ( $\text{\AA}^2$ ) for non-hydrogen atoms in the crystal structure of **2**. See Figure 2 for atom numbering.

| Atom | <i>x</i>    | <i>y</i>    | <i>z</i>    | $U_{\text{equiv}}$ |
|------|-------------|-------------|-------------|--------------------|
| B(9) | 0.5879(2)   | 0.0879(2)   | 0.4121(2)   | 0.0420             |
| N(1) | 0.68782(14) | 0.18782(14) | 0.31218(14) | 0.0256             |
| C(2) | 0.67891(19) | 0.34236(19) | 0.35833(18) | 0.0323             |
| C(3) | 0.7903(2)   | 0.43414(18) | 0.2794(2)   | 0.0360             |
| C(4) | 0.84827(19) | 0.34827(19) | 0.15173(19) | 0.0340             |

**Table S12** Atomic coordinates and isotropic thermal parameters ( $\text{\AA}^2$ ) for the hydrogen atoms in the crystal structure of **2**. See Figure 2 for atom numbering.

| Atom  | <i>x</i> | <i>y</i>  | <i>z</i> | $U_{\text{iso}}$ |
|-------|----------|-----------|----------|------------------|
| H(10) | 0.597(3) | -0.025(3) | 0.362(2) | 0.058(7)         |
| H(2)  | 0.6969   | 0.3485    | 0.4643   | 0.0388           |
| H'(2) | 0.5805   | 0.3800    | 0.3365   | 0.0388           |
| H(3)  | 0.8710   | 0.4586    | 0.3462   | 0.0432           |
| H'(3) | 0.7442   | 0.5248    | 0.2441   | 0.0432           |
| H(4)  | 0.9104   | 0.4104    | 0.0896   | 0.0408           |

**Table S13** Anisotropic thermal parameters ( $\text{\AA}^2$ ) for the crystal structure of **2**. See Figure 2 for atom numbering.

| Atom | $U_{11}$   | $U_{22}$   | $U_{33}$   | $U_{23}$   | $U_{13}$   | $U_{12}$    |
|------|------------|------------|------------|------------|------------|-------------|
| B(9) | 0.0420(10) | 0.0420(10) | 0.0420(10) | 0.0084(10) | 0.0084(10) | -0.0084(10) |
| N(1) | 0.0256(5)  | 0.0256(5)  | 0.0256(5)  | -0.0023(6) | -0.0023(6) | 0.0023(6)   |
| C(2) | 0.0366(9)  | 0.0288(9)  | 0.0315(9)  | -0.0049(7) | 0.0032(7)  | 0.0039(8)   |
| C(3) | 0.0420(11) | 0.0257(9)  | 0.0402(10) | -0.0022(7) | -0.0025(9) | -0.0016(8)  |
| C(4) | 0.0340(7)  | 0.0340(7)  | 0.0340(7)  | 0.0034(8)  | 0.0034(8)  | -0.0034(8)  |

**Figure S1** Experimental and difference (experimental – theoretical) molecular-scattering intensity curves for **1**.

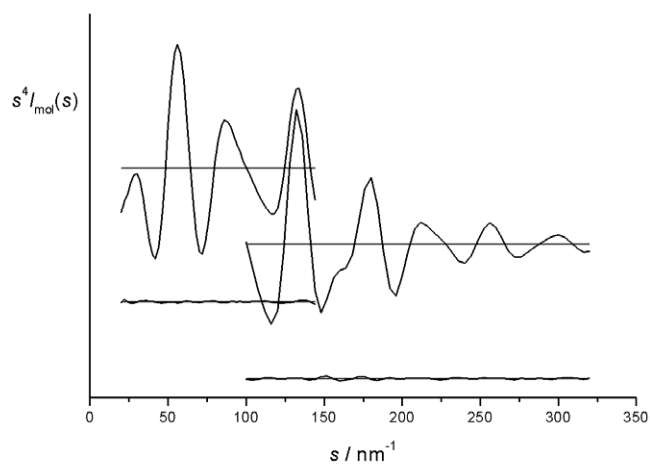

**Figure S2** Experimental and difference (experimental – theoretical) molecular-scattering intensity curves for **2**.

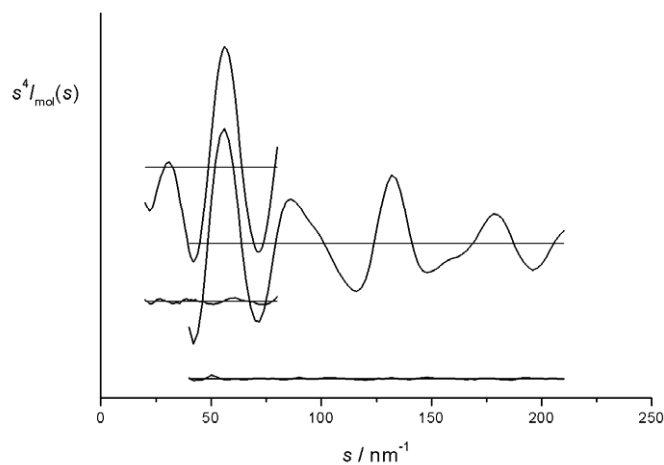

**Figure S3** Experimental and difference (experimental – theoretical) molecular-scattering intensity curves for **3**.

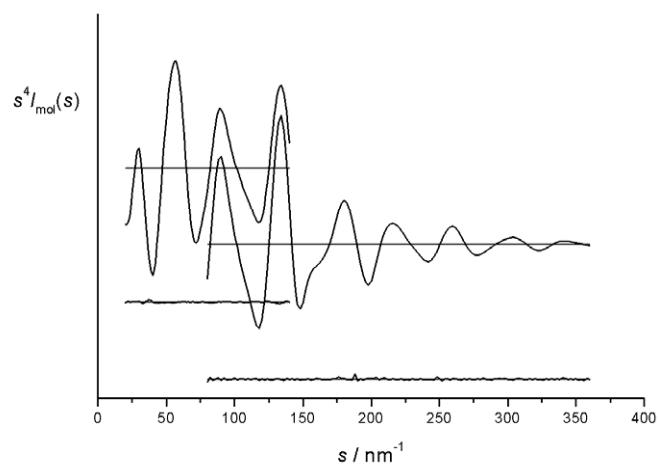

Supplement: b701476g.pdf [file b701476g.pdf]
